# Supplementary material for: An international reproducibility study validating quantitative determination of ERBB2, ESR1, PGR, and MKI67 mRNA in breast cancer using MammaTyper®
Source: Springer Nature journal article supplement (doi:10.1186/s13058-017-0848-z), 2017-05-11

Figure S2.

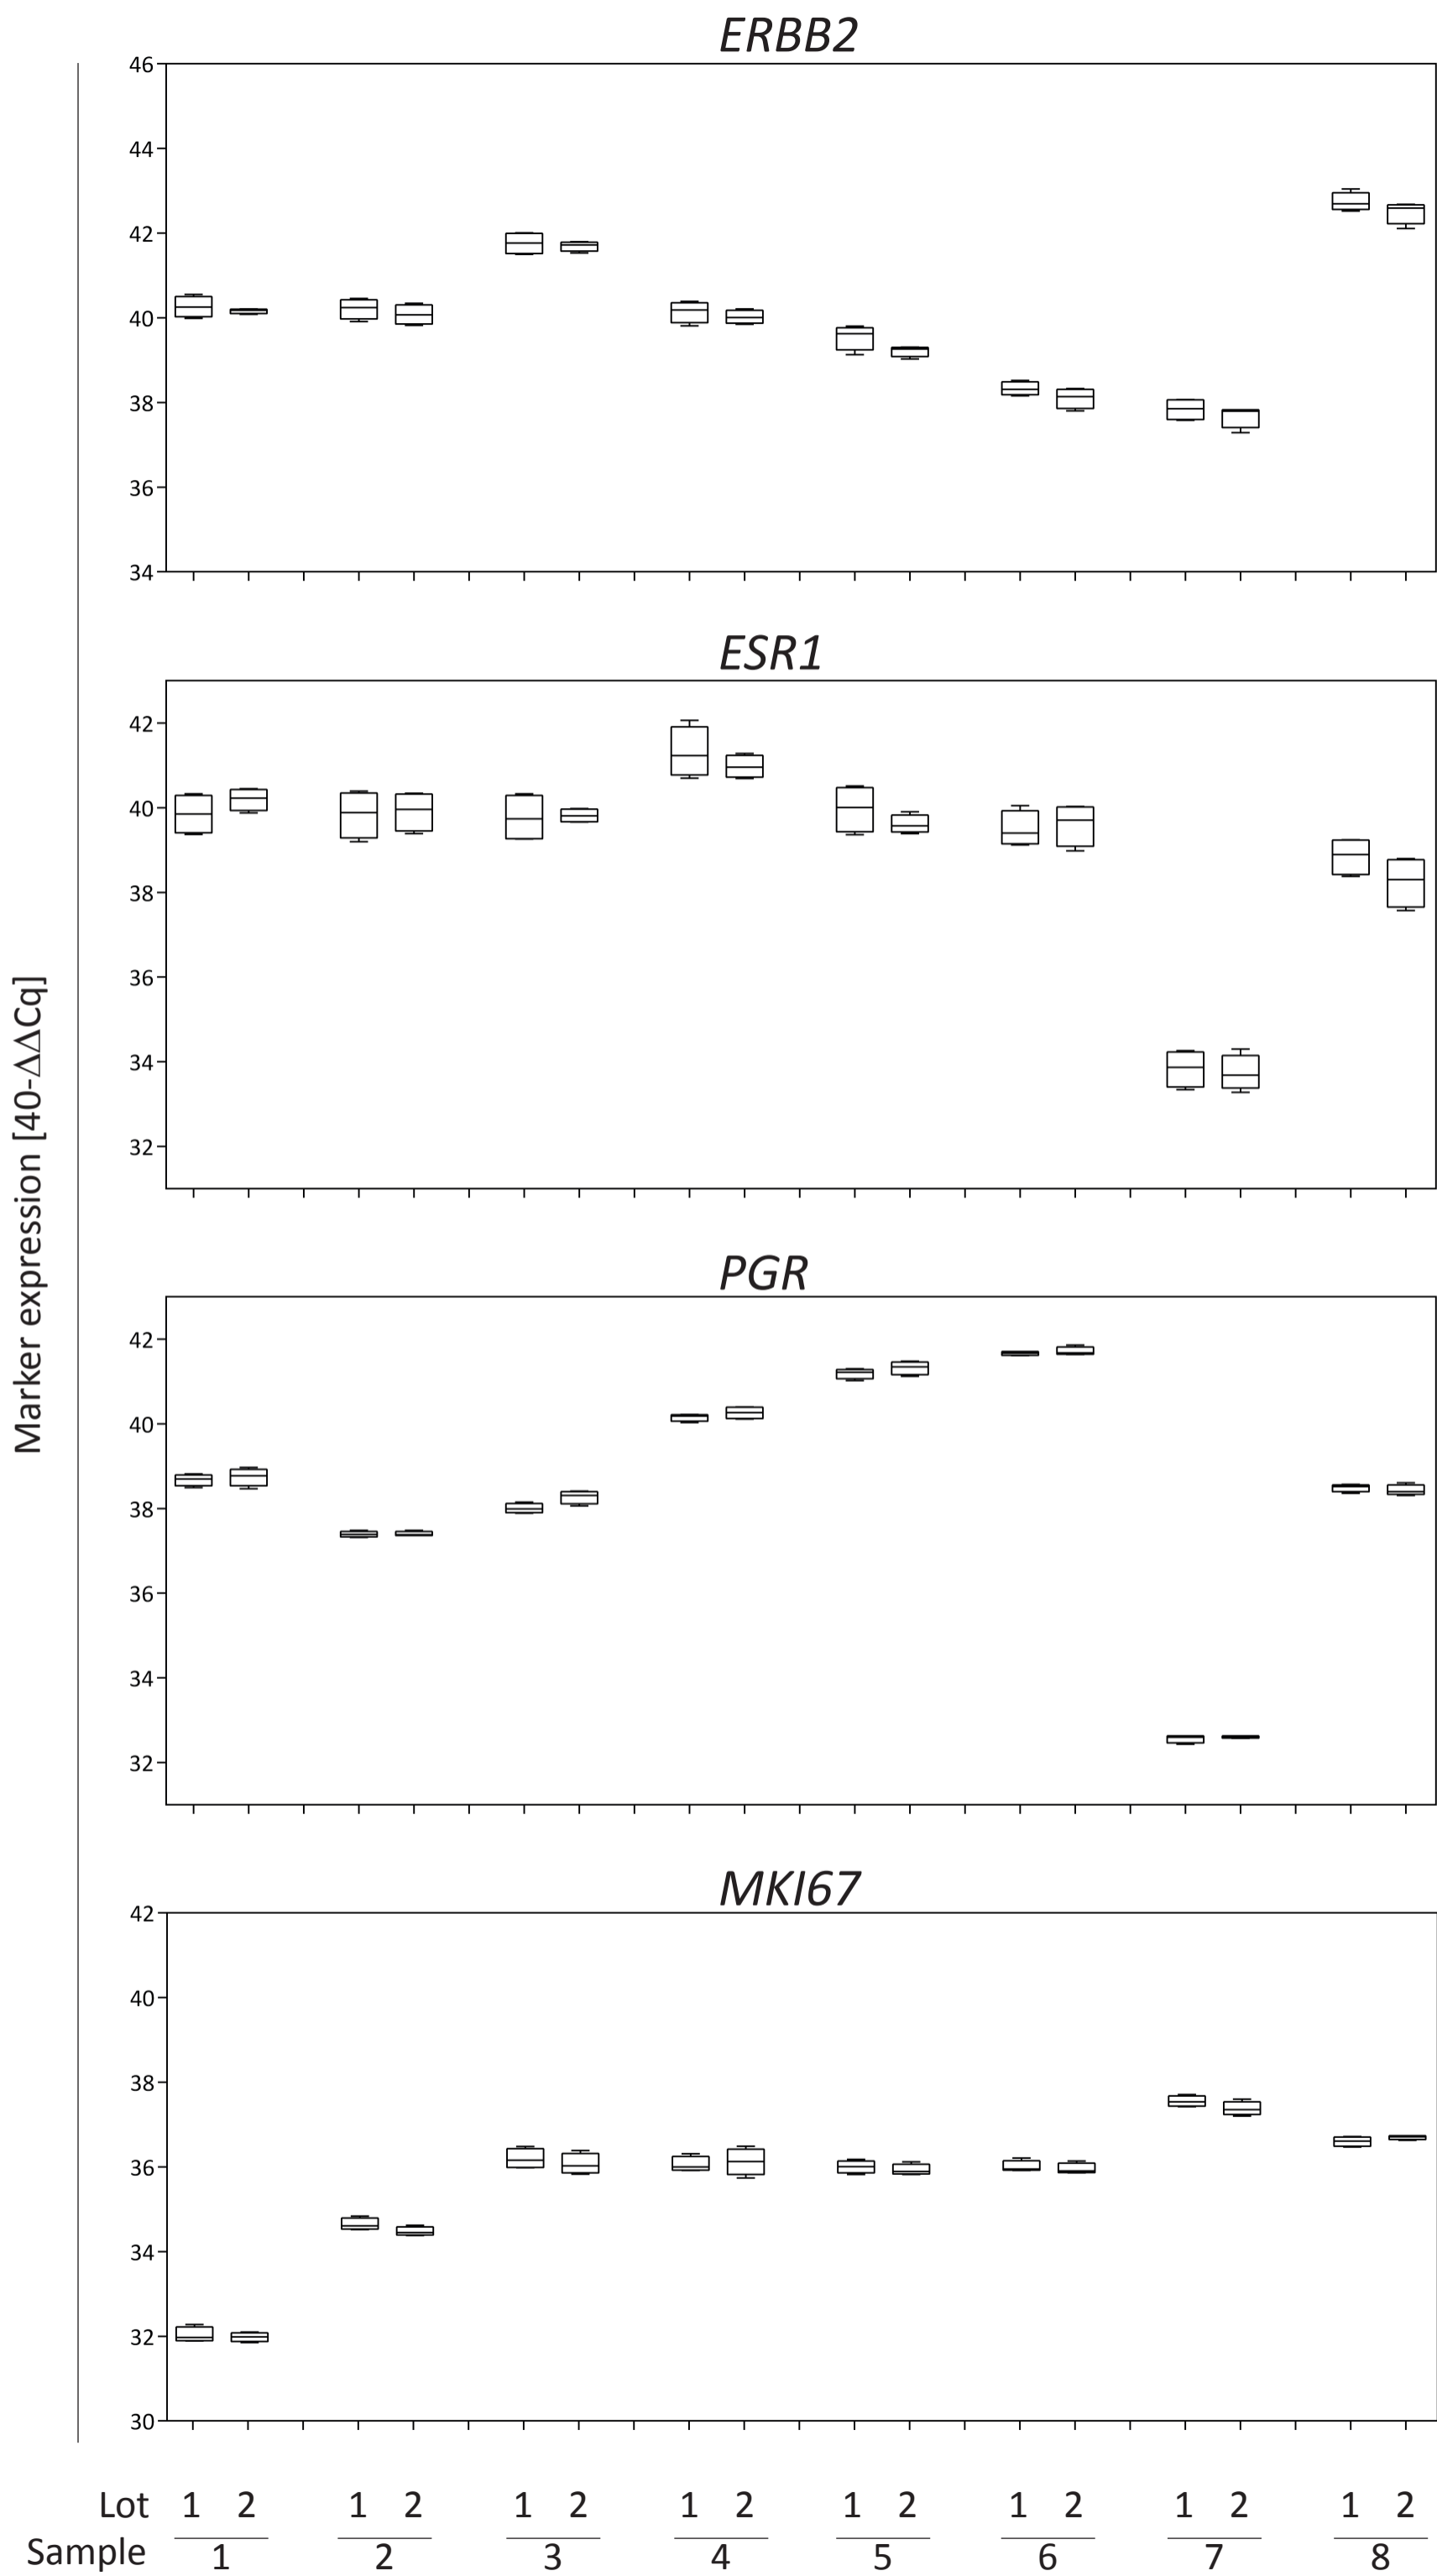

Supplement: MOESM3 [file 12278542]
